# Supplementary material for: Combination of metronomic cyclophosphamide and dietary intervention inhibits neuroblastoma growth in a CD1-nu mouse model
Source: PubMed Central journal article supplement (PMC4941371; doi:10.18632/oncotarget.7929), 2016-03-05
Supplement: oncotarget-07-17060-s001.pdf [file oncotarget-07-17060-s001.pdf]

# Combination of metronomic cyclophosphamide and dietary intervention inhibits neuroblastoma growth in a CD1-nu mouse model

## Supplementary Materials

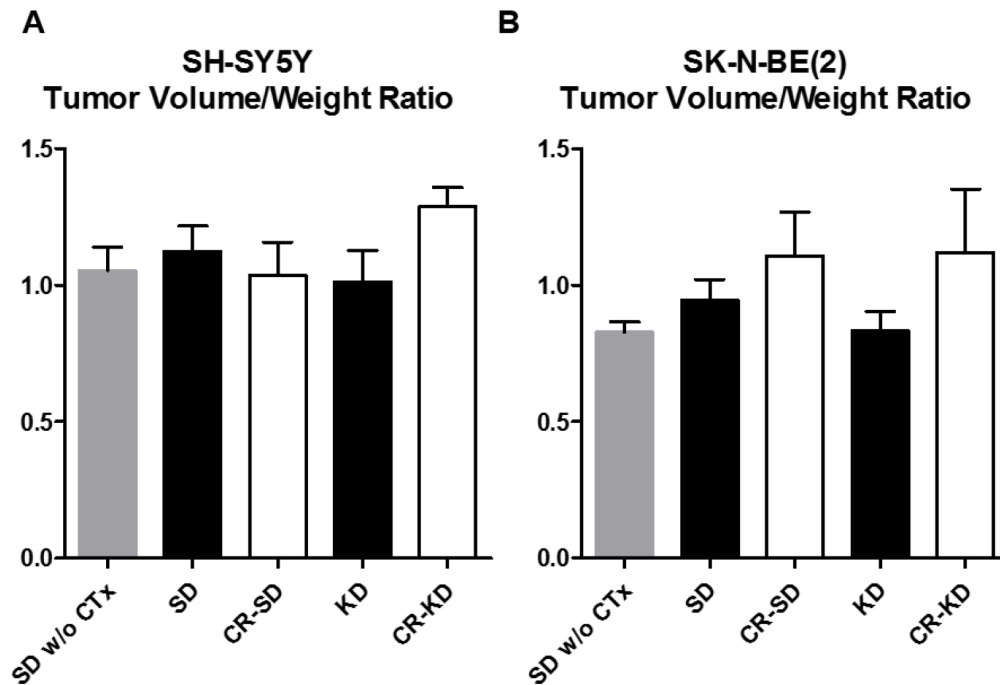

Supplementary Figure S1: Tumor volume (mm<sup>3</sup>) to weight (mg) ratio.

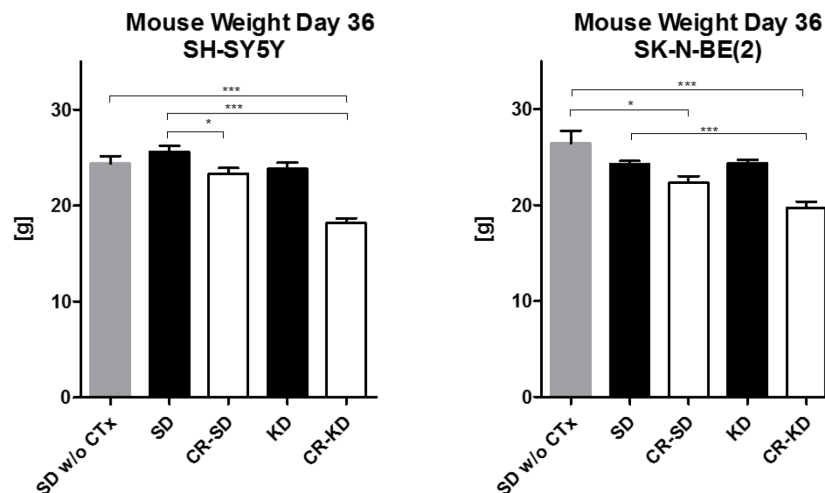

Supplementary Figure S2: Comparison of mouse weights on Day 36 or last day of therapy.

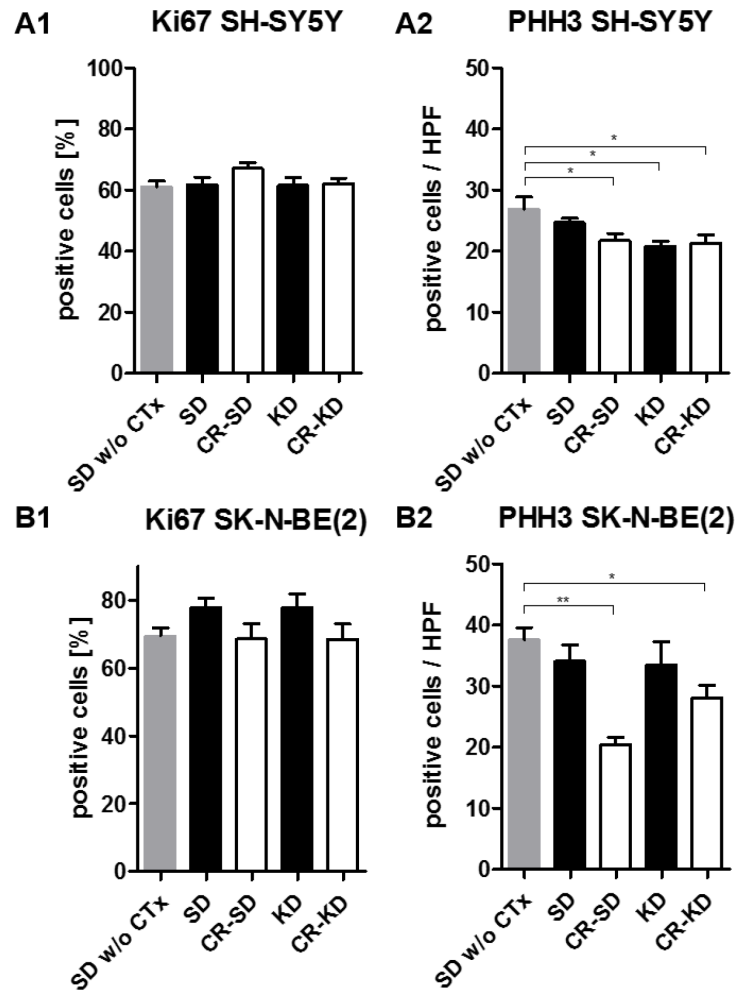

Supplementary Figure S3: Proliferation indices of dietary intervention subgroups.

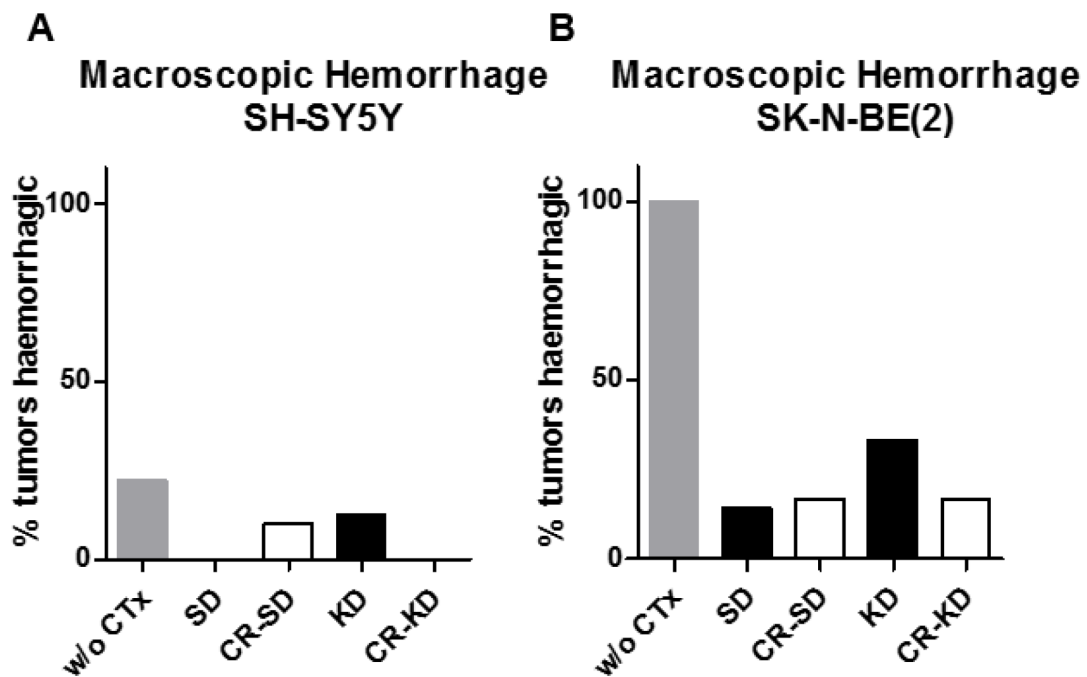

Supplementary Figure S4: Predominant intratumoral hemorrhage in MYCN-amplified tumors is reversed upon MCP treatment in all subgroups ( $n \geq 6$ ).

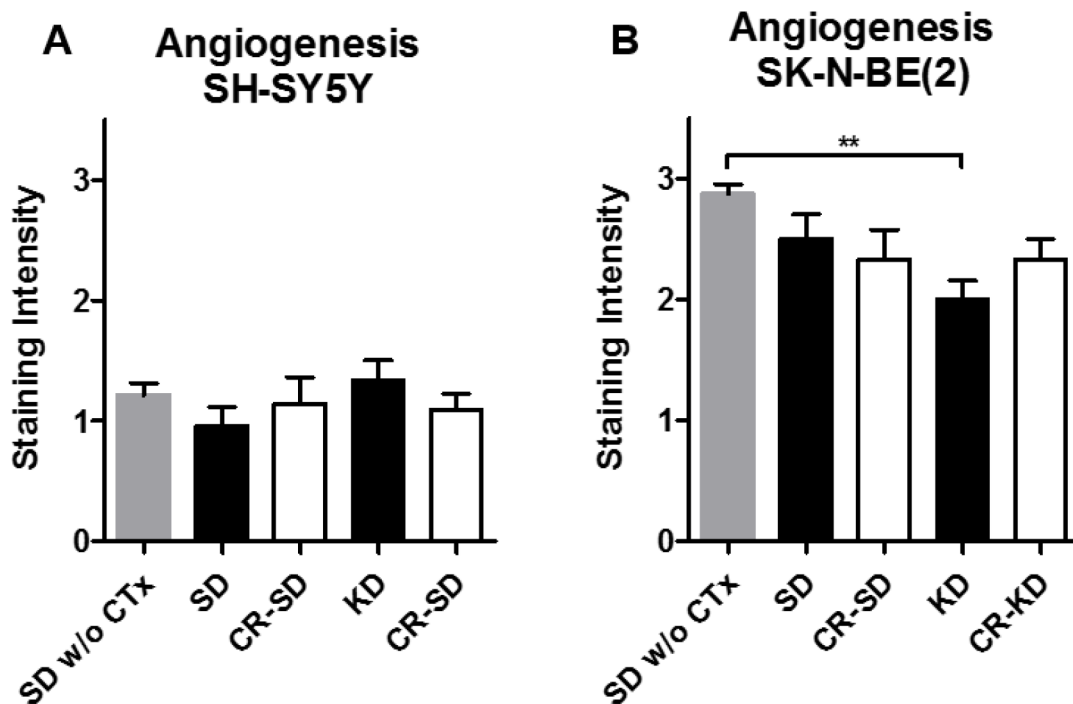

Supplementary Figure S5: Inhibition of angiogenesis by MCP and dietary intervention.

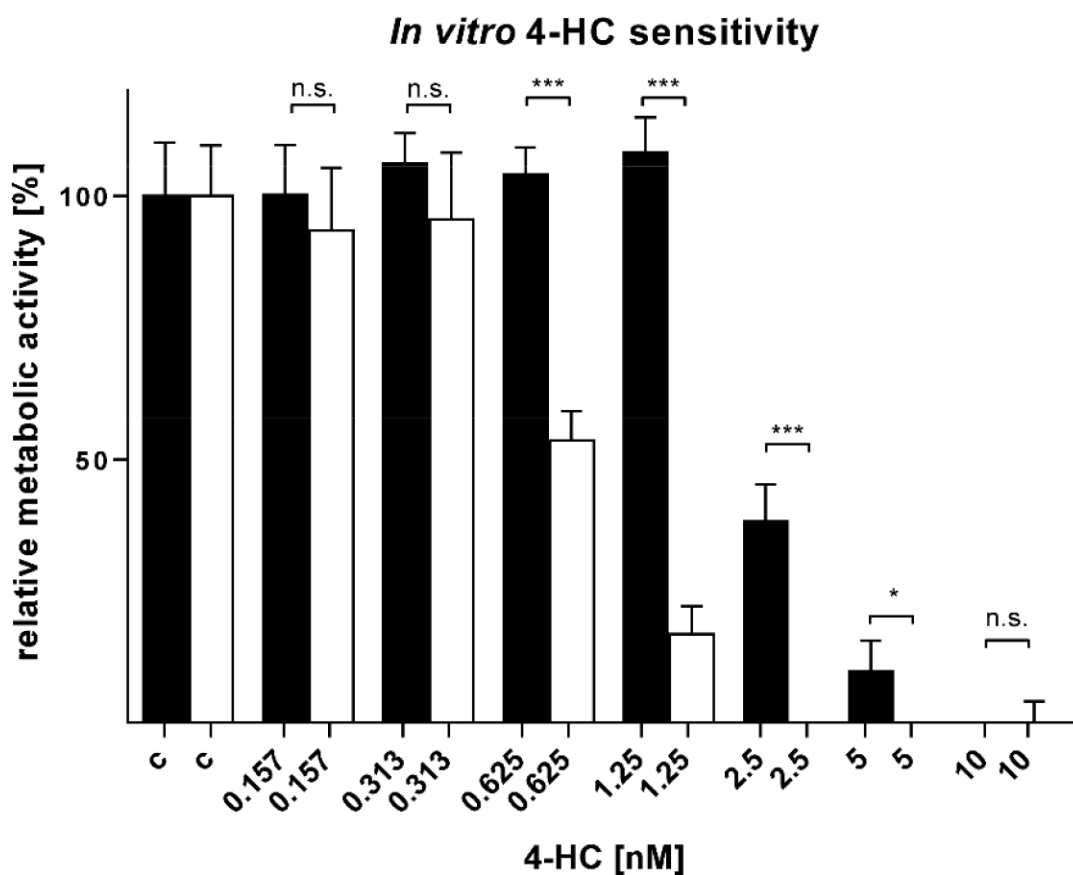

Supplementary Figure S6: *In vitro* 4-HC sensitivity. In line with the data reported in literature, the SH-SY5Y cell line (white bars) proved significantly more susceptible to 4-HC than SK-N-BE(2) cells (black bars). Data is presented as mean  $\pm$  SEM metabolic activity (MTT assay) of the corresponding 4-HC and normalized to control concentration. An average of two experiments is displayed ( $n = 12$ ). Statistics: Student's  $t$  test ( $p < 0.05$ ); \* $p \leq 0.05$ ; \*\* $p \leq 0.01$ ; \*\*\* $p \leq 0.001$ . Abbreviations: 4-HC 4-hydroperoxycyclophosphamide; MTT 3-(4, 5-dimethylthiazol-2-yl)-2, 5-diphenyltetrazolium bromide.

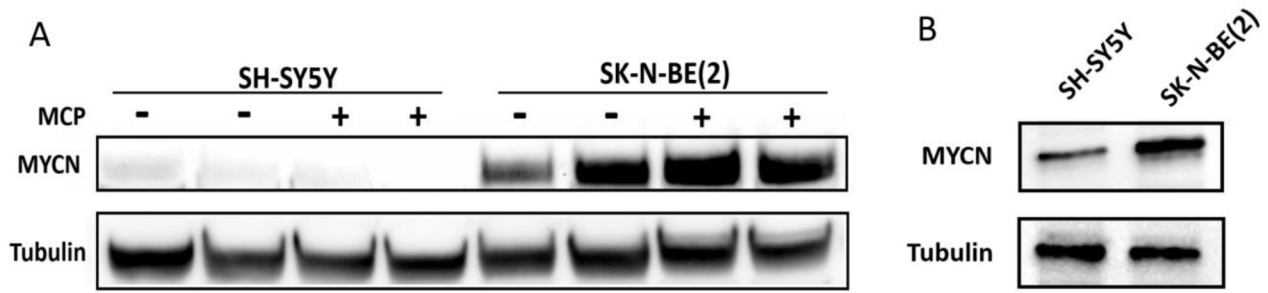

**Supplementary Figure S7: Western blot of MYCN levels in SH-SY5Y and SK-N-BE(2).** (A) xenografts and (B) whole cell lysates from tissue culture.

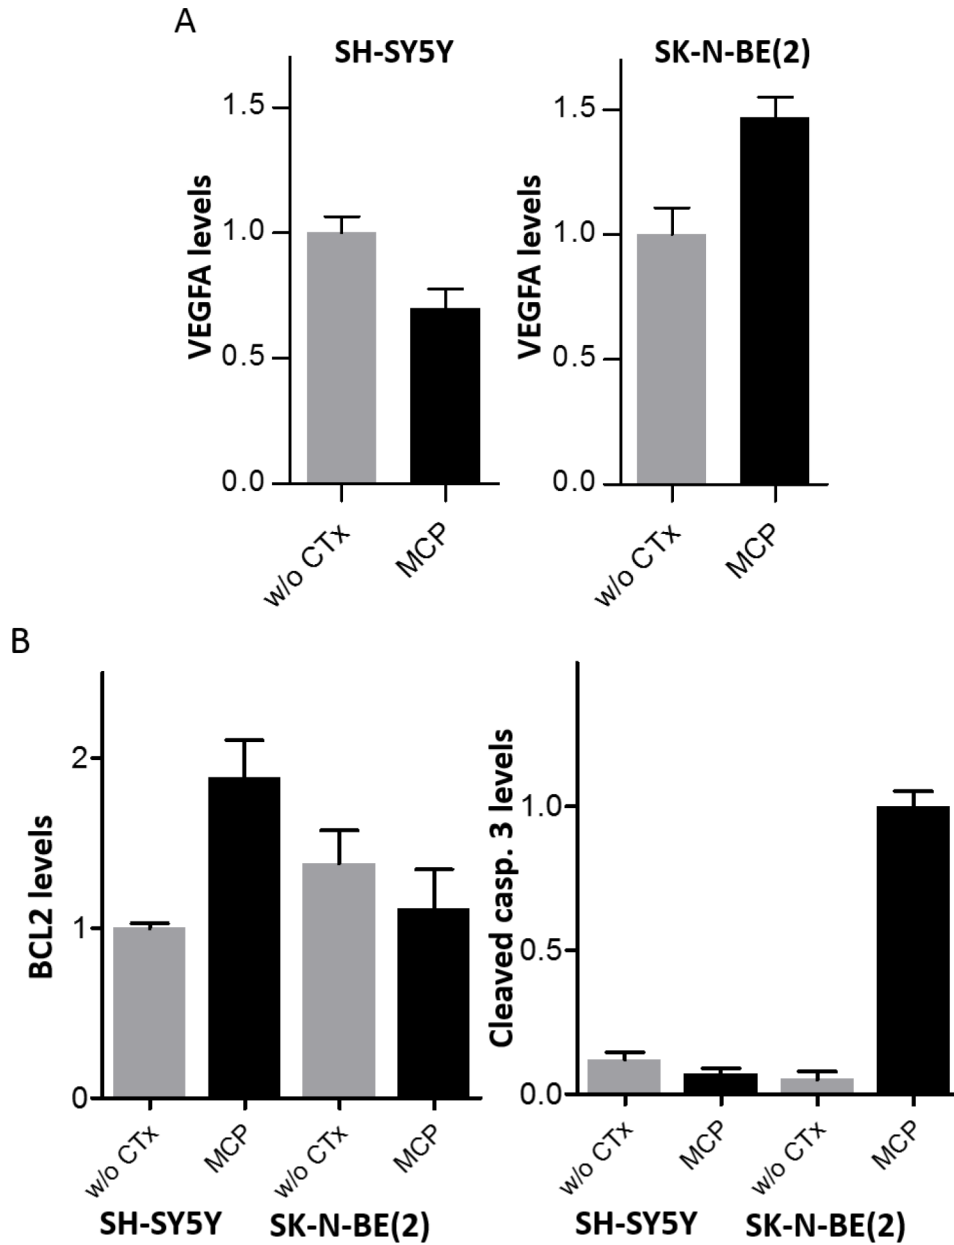

**Supplementary Figure S8: Quantification of protein levels using Image Lab 5.2.1 software for (A) VEGFA western blot from Figure 5D and (B) BCL2 and Cleaved caspase 3 western blot from Figure 7C.** Relative levels are shown with signal intensities normalized to the respective loading control (Tubulin).

**Supplementary Table S1: Metabolic parameters blood glucose (BG), ketone body (KB) levels and body weight (BW)**

**A-SH-SY5Y**

| Diet | SD w/o C'Tx |             |            | SD      |             |            | CR-SD    |             |            | KD       |             |            | CR-KD   |             |            |
|------|-------------|-------------|------------|---------|-------------|------------|----------|-------------|------------|----------|-------------|------------|---------|-------------|------------|
|      | BG          | KB          | BW         | BG      | KB          | BW         | BG       | KB          | BW         | BG       | KB          | BW         | BG      | KB          | BW         |
| 5    | 148 ± 10    | 0.36 ± 0.05 | 24.8 ± 0.6 | 139 ± 6 | 0.31 ± 0.04 | 25.7 ± 0.6 | 113 ± 10 | 0.55 ± 0.07 | 25 ± 0.4   | 120 ± 10 | 0.84 ± 0.1  | 24.9 ± 0.5 | 94 ± 8  | 1.46 ± 0.24 | 25.7 ± 0.4 |
| 8    | 155 ± 8     | 0.34 ± 0.05 | 25.1 ± 0.8 | 148 ± 7 | 0.41 ± 0.04 | 25.1 ± 0.6 | 102 ± 6  | 0.56 ± 0.13 | 22.4 ± 0.6 | 142 ± 13 | 0.77 ± 0.05 | 23.2 ± 0.6 | 84 ± 5  | 1.23 ± 0.2  | 20.3 ± 0.5 |
| 12   | 149 ± 7     | 0.43 ± 0.08 | 25.1 ± 0.8 | 155 ± 7 | 0.47 ± 0.06 | 24.7 ± 0.5 | 112 ± 10 | 0.74 ± 0.11 | 22.2 ± 0.4 | 161 ± 9  | 0.79 ± 0.09 | 22.2 ± 1   | 100 ± 9 | 1.42 ± 0.2  | 18.7 ± 0.6 |
| 15   | 168 ± 12    | 0.45 ± 0.08 | 26.2 ± 0.7 | 156 ± 9 | 0.47 ± 0.08 | 25.7 ± 0.4 | 127 ± 9  | 0.62 ± 0.11 | 21.3 ± 0.4 | 162 ± 9  | 0.92 ± 0.09 | 22.8 ± 0.8 | 106 ± 5 | 1.45 ± 0.29 | 17.4 ± 0.6 |
| 19   | 148 ± 20    | 0.4 ± 0.14  | 25.8 ± 0.7 | 165 ± 7 | 0.43 ± 0.04 | 25.5 ± 0.5 | 131 ± 6  | 0.65 ± 0.07 | 21.6 ± 0.5 | 164 ± 8  | 0.96 ± 0.08 | 23.2 ± 0.8 | 117 ± 6 | 1.26 ± 0.24 | 16.9 ± 0.5 |
| 22   |             |             |            | 148 ± 7 | 0.52 ± 0.07 | 26 ± 0.5   | 126 ± 6  | 0.61 ± 0.09 | 21.4 ± 0.5 | 157 ± 6  | 1.11 ± 0.11 | 23.1 ± 0.7 | 111 ± 7 | 1.15 ± 0.15 | 17.1 ± 0.4 |
| 26   |             |             |            | 155 ± 7 | 0.54 ± 0.06 | 26.4 ± 0.6 | 125 ± 6  | 0.62 ± 0.13 | 22 ± 0.5   | 162 ± 9  | 0.81 ± 0.13 | 24 ± 0.6   | 117 ± 7 | 1.07 ± 0.12 | 17 ± 0.4   |
| 29   |             |             |            | 147 ± 7 | 0.44 ± 0.07 | 26.4 ± 0.5 | 113 ± 6  | 0.55 ± 0.07 | 22.3 ± 0.4 | 157 ± 8  | 1.06 ± 0.13 | 23.9 ± 0.7 | 105 ± 8 | 1.1 ± 0.14  | 17 ± 0.4   |
| 33   |             |             |            | 142 ± 7 | 0.41 ± 0.06 | 25.9 ± 0.4 | 137 ± 7  | 0.56 ± 0.07 | 22.9 ± 0.5 | 163 ± 8  | 0.73 ± 0.07 | 23.8 ± 0.7 | 94 ± 6  | 1.29 ± 0.19 | 16.9 ± 0.6 |
| 36   |             |             |            | 145 ± 8 | 0.36 ± 0.05 | 26 ± 0.5   | 116 ± 8  | 0.53 ± 0.1  | 23 ± 0.6   | 157 ± 9  | 0.62 ± 0.09 | 23.9 ± 0.7 | 106 ± 8 | 1.24 ± 0.14 | 16 ± 1.7   |

**B -SK-N-BE(2)**

| Diet | SD w/o C'Tx |             |            | SD       |             |            | CR-SD    |             |            | KD       |             |            | CR-KD    |             |            |
|------|-------------|-------------|------------|----------|-------------|------------|----------|-------------|------------|----------|-------------|------------|----------|-------------|------------|
|      | BG          | KB          | BW         | BG       | KB          | BW         | BG       | KB          | BW         | BG       | KB          | BW         | BG       | KB          | BW         |
| 5    | 162 ± 12    | 0.5 ± 0.06  | 25.3 ± 1.2 | 169 ± 9  | 0.46 ± 0.06 | 23.6 ± 0.4 | 133 ± 8  | 0.71 ± 0.09 | 21.8 ± 0.5 | 177 ± 7  | 0.94 ± 0.1  | 22.9 ± 0.5 | 113 ± 11 | 1.76 ± 0.2  | 19.9 ± 0.4 |
| 8    | 164 ± 8     | 0.49 ± 0.1  | 25.8 ± 1.2 | 162 ± 7  | 0.44 ± 0.06 | 23.4 ± 0.4 | 148 ± 11 | 0.73 ± 0.07 | 21.1 ± 0.4 | 186 ± 9  | 1.12 ± 0.1  | 23 ± 0.4   | 135 ± 6  | 1.01 ± 0.13 | 18.9 ± 0.5 |
| 12   | 166 ± 8     | 0.5 ± 0.07  | 25.8 ± 1.3 | 164 ± 13 | 0.5 ± 0.07  | 23.4 ± 0.4 | 143 ± 12 | 0.57 ± 0.09 | 20.5 ± 0.6 | 162 ± 11 | 1.08 ± 0.12 | 23.6 ± 0.3 | 109 ± 7  | 1.28 ± 0.11 | 18.2 ± 0.5 |
| 15   | 167 ± 9     | 0.54 ± 0.09 | 26.5 ± 1.3 | 164 ± 8  | 0.56 ± 0.07 | 23.5 ± 0.3 | 145 ± 9  | 0.76 ± 0.11 | 20.3 ± 0.6 | 158 ± 6  | 0.89 ± 0.11 | 23.8 ± 0.4 | 124 ± 7  | 1.29 ± 0.09 | 18 ± 0.5   |
| 19   | 156 ± 9     | 0.51 ± 0.08 | 26.7 ± 1.2 | 164 ± 11 | 0.6 ± 0.06  | 24 ± 0.3   | 117 ± 10 | 0.78 ± 0.15 | 20.6 ± 0.5 | 162 ± 7  | 0.94 ± 0.07 | 24.1 ± 0.4 | 125 ± 8  | 1.39 ± 0.13 | 18.2 ± 0.7 |
| 22   |             |             |            | 158 ± 5  | 0.7 ± 0.09  | 23.9 ± 0.4 | 145 ± 11 | 0.62 ± 0.07 | 20.9 ± 0.5 | 164 ± 7  | 1.03 ± 0.09 | 24.2 ± 0.3 | 124 ± 7  | 1.35 ± 0.11 | 18.3 ± 0.7 |
| 26   |             |             |            | 151 ± 8  | 0.59 ± 0.09 | 24.2 ± 0.3 | 126 ± 8  | 0.69 ± 0.08 | 21.4 ± 0.5 | 165 ± 10 | 1.09 ± 0.08 | 24.3 ± 0.3 | 116 ± 7  | 1.08 ± 0.12 | 18.9 ± 0.8 |
| 29   |             |             |            | 166 ± 6  | 0.66 ± 0.07 | 23.9 ± 0.4 | 137 ± 10 | 0.71 ± 0.09 | 21.9 ± 0.5 | 166 ± 7  | 1.13 ± 0.07 | 24.3 ± 0.4 | 108 ± 7  | 1.37 ± 0.09 | 19.5 ± 0.6 |
| 33   |             |             |            | 145 ± 10 | 0.64 ± 0.09 | 24 ± 0.4   | 133 ± 5  | 0.71 ± 0.05 | 22.3 ± 0.6 | 174 ± 8  | 1.06 ± 0.07 | 24.3 ± 0.3 | 115 ± 9  | 1.08 ± 0.11 | 19.5 ± 0.6 |
| 36   |             |             |            | 156 ± 6  | 0.68 ± 0.09 | 24.2 ± 0.3 | 122 ± 8  | 0.69 ± 0.12 | 22.3 ± 0.7 | 161 ± 9  | 1.16 ± 0.08 | 24.4 ± 0.3 | 117 ± 7  | 1.42 ± 0.14 | 19.7 ± 0.6 |

**Supplementary Table S2: Glucose ketone index (GKI) at each measured time point for different therapy groups**

**A-SH-SY5Y**

| day     | Diet Group |      |       |      |       |
|---------|------------|------|-------|------|-------|
|         | SD w/o CTx | SD   | CR-SD | KD   | CR-KD |
| 5       | 22.8       | 24.9 | 11.4  | 7.9  | 3.6   |
| 8       | 25.3       | 20.0 | 10.1  | 10.2 | 3.8   |
| 12      | 19.2       | 18.3 | 8.4   | 11.3 | 3.9   |
| 15      | 20.7       | 18.4 | 11.4  | 9.8  | 4.1   |
| 19      | 20.5       | 21.3 | 11.2  | 9.5  | 5.2   |
| 22      |            | 15.8 | 11.5  | 7.9  | 5.4   |
| 26      |            | 15.9 | 11.2  | 11.1 | 6.1   |
| 29      |            | 18.5 | 11.4  | 8.2  | 5.3   |
| 33      |            | 19.2 | 13.6  | 12.4 | 4.0   |
| 36      |            | 22.4 | 12.1  | 14.1 | 4.7   |
| Average | 21.7       | 19.5 | 11.2  | 10.2 | 4.6   |

**B-SK-N-BE(2)**

| day     | Diet Group |      |       |      |       |
|---------|------------|------|-------|------|-------|
|         | SD w/o CTx | SD   | CR-SD | KD   | CR-KD |
| 5       | 18.0       | 23.5 | 10.5  | 10.9 | 3.7   |
| 8       | 22.8       | 22.5 | 11.7  | 9.4  | 7.5   |
| 12      | 18.4       | 18.2 | 15.9  | 9.0  | 5.0   |
| 15      | 18.5       | 18.2 | 11.5  | 11.0 | 5.7   |
| 19      | 17.3       | 15.2 | 9.3   | 10.0 | 5.3   |
| 22      |            | 12.5 | 13.4  | 9.1  | 5.3   |
| 26      |            | 16.8 | 11.7  | 9.2  | 6.4   |
| 29      |            | 15.4 | 10.9  | 8.4  | 4.6   |
| 33      |            | 13.4 | 10.5  | 9.7  | 6.4   |
| 36      |            | 14.4 | 11.3  | 8.1  | 4.6   |
| Average | 19.0       | 17.0 | 11.7  | 9.5  | 5.5   |

### Supplementary Table S3

| <b>SH-SY5Y</b> |                                    |                        |                      |                       |
|----------------|------------------------------------|------------------------|----------------------|-----------------------|
| $i_1$ (MCP)    | 0.23                               |                        |                      |                       |
|                | $i_2$ (Diet, Morscher et al. 2015) | hypothetical $i_{1,2}$ | calculated $i_{1,2}$ | Ratio (calc./hypoth.) |
| CR-SD          | 0.52                               | 0.12                   | 0.11                 | 0.96                  |
| KD             | 0.48                               | 0.11                   | 0.09                 | 0.86                  |
| CR-KD          | 0.33                               | 0.08                   | 0.03                 | 0.44                  |

### SK-N-BE(2)

| $i_1$ (MCP) | 0.07                               |                        |                      |                       |
|-------------|------------------------------------|------------------------|----------------------|-----------------------|
|             | $i_2$ (Diet, Morscher et al. 2015) | hypothetical $i_{1,2}$ | calculated $i_{1,2}$ | Ratio (calc./hypoth.) |
| CR-SD       | 0.55                               | 0.04                   | 0.02                 | 0.61                  |
| KD          | 0.91                               | 0.06                   | 0.04                 | 0.62                  |
| CR-KD       | 0.28                               | 0.02                   | 0.04                 | 1.89                  |

### Supplementary Table S4: Ingredient list of the two diets

|                        | <b>Standard Diet</b> | <b>Ketogenic Diet</b> |
|------------------------|----------------------|-----------------------|
| <b>Crude Nutrients</b> | %                    | %                     |
| Dry matter             | 87.8                 | 98.0                  |
| Crude protein          | 19.0                 | 15.9                  |
| Crude Fat              | 3.3                  | 57.0                  |
| Crude fibre            | 4.9                  | 4.6                   |
| Crude ash              | 6.4                  | 5.2                   |
| N free extracts        | 54.2                 | 15.5                  |
| Carbohydrates          | 41.3                 | 11.1                  |
| Starch                 | 36.6                 | 0.1                   |
| Saccharose             | 4.7                  | 11.0                  |
| <b>Fatty Acids</b>     | %                    | %                     |
| short chain            | –                    | 0.19                  |
| medium chain           | –                    | 0.69                  |
| long chain             | 3.33                 | 53.69                 |
| <b>Minerals</b>        | %                    | %                     |
| Calcium                | 1.00                 | 0.92                  |
| Phosphorus             | 0.70                 | 0.61                  |
| Sodium                 | 0.24                 | 0.19                  |
| Magnesium              | 0.23                 | 0.21                  |
| Potassium              | 0.92                 | 0.95                  |
| <b>Amino Acids</b>     | %                    | %                     |
| Lysine                 | 1.10                 | 1.32                  |
| Methionine             | 0.35                 | 0.59                  |
| Met+Cys                | 0.70                 | 0.86                  |
| Threonine              | 0.68                 | 0.70                  |
| Tryptophan             | 0.25                 | 0.21                  |
| Arginine               | 1.16                 | 0.62                  |
| Histidine              | 0.45                 | 0.48                  |
| Valine                 | 0.90                 | 1.11                  |
| Isoleucine             | 0.78                 | 0.90                  |
| Leucine                | 1.33                 | 1.58                  |

|               |      |      |
|---------------|------|------|
| Phenylalanine | 0.87 | 0.82 |
| Phe+Tyr       | 1.47 | 1.66 |
| Glycine       | 0.82 | 0.34 |
| Glutamic acid | 3.97 | 3.58 |
| Aspartic acid | 1.66 | 1.18 |
| Proline       | 1.28 | 1.82 |
| Alanine       | 0.81 | 0.53 |
| Serine        | 0.92 | 0.95 |
